# Supplementary material for: BARD1 germline variants induce haploinsufficiency and DNA repair defects in neuroblastoma
Source: PubMed Central journal article supplement — bioRxiv. 2023 Feb 3:2023.01.31.525066. Preprint. [Version 1] doi: 10.1101/2023.01.31.525066 (PMC9915690; doi:10.1101/2023.01.31.525066), 2023-02-03
Supplement: media-1.pdf [file media-1.pdf]

## ***BARD1* germline variants induce haploinsufficiency and DNA repair defects in neuroblastoma**

Michael P. Randall, MD<sup>1\*</sup>; Laura E. Egolf, PhD<sup>1,2\*</sup>; Zalman Vaksman, PhD<sup>1+</sup>; Minu Samanta, MD<sup>1</sup>; Matthew Tsang, MS<sup>1</sup>; David Groff, MES<sup>1</sup>; J. Perry Evans, PhD<sup>3#</sup>; Jo Lynne Rokita, PhD<sup>3,4,5</sup>; Mehdi Layeghifard, PhD<sup>6</sup>; Adam Shlien, PhD<sup>6,7,8</sup>; John M. Maris, MD<sup>1,2,9</sup>; Sharon J. Diskin, PhD<sup>1,2,9\*</sup>; Kristopher R. Bosse, MD<sup>1,2,9\*^</sup>

<sup>1</sup>Division of Oncology and Center for Childhood Cancer Research, Children's Hospital of Philadelphia, Philadelphia, PA 19104, USA

<sup>2</sup>Cell and Molecular Biology Graduate Group, Perelman School of Medicine at the University of Pennsylvania, Philadelphia, PA 19104, USA

<sup>3</sup>Department of Biomedical and Health Informatics, Children's Hospital of Philadelphia, Philadelphia, PA 19104, USA

<sup>4</sup>Center for Data-Driven Discovery in Biomedicine, Children's Hospital of Philadelphia, PA 19104, USA

<sup>5</sup>Division of Neurosurgery, Children's Hospital of Philadelphia, PA 19104, USA

<sup>6</sup>Genetics and Genome Biology, The Hospital for Sick Children, Toronto, Ontario, Canada

<sup>7</sup>Department of Laboratory Medicine and Pathobiology, University of Toronto, Toronto, Ontario, Canada

<sup>8</sup>Department of Pediatric Laboratory Medicine, The Hospital for Sick Children, Toronto, Ontario, Canada

<sup>9</sup>Department of Pediatrics, Perelman School of Medicine at the University of Pennsylvania, Philadelphia, PA 19104, USA

\*These authors contributed equally

#Present address: Genomics and Data Sciences, Spark Therapeutics, Philadelphia, PA 19104, USA

+Present Address: New York Genome Center, New York, NY 10013, USA

^Correspondence

## Supplemental Methods

### Cell culture

IMR-5 and RPE1 cells were obtained from the Children's Hospital of Philadelphia (CHOP) cell line bank. RPE1 cells are a human retinal pigment epithelium cell line immortalized through the retroviral insertion of human telomerase reverse transcriptase (hTERT) and were originally a kind gift from the laboratory of Dr. Michael Hogarty. Cell lines were cultured in RPMI containing 10% FBS and 2 mM L-Glutamine at 37°C under 5% CO<sub>2</sub>. Cells were regularly tested for the presence of mycoplasma and genotyped to confirm cell identity using short tandem repeat (STR) typing.

### Generation of isogenic cell models

IMR-5 and hTERT RPE1 cells were electroporated using a Lonza 4D-Nucleofector X-unit™ with 1.6 µg pU6-(BbsI)\_CBh-Cas9-T2A-mCherry, into which one of four guide RNA sequences (R112\*, R150\*, E287fs, Q564\*; **Supplemental Table 2**) had been cloned, and 0.4 µg single-stranded donor oligonucleotides containing the desired *BARD1* mutation and a synonymous PAM-ablating mutation. The pU6-(BbsI)\_CBh-Cas9-T2A-mCherry plasmid was a gift from Ralf Kuehn (Addgene plasmid # 64324; <http://n2t.net/addgene:64324>; RRID:Addgene\_64324).<sup>1</sup> Following electroporation, cells were transferred to media containing 5 µM L755507 (Selleck Chemicals) to enhance homology-directed repair efficiency.<sup>2</sup> Two days later, single mCherry-positive cells were sorted into 96-well plates using a BD FACSJazz cell sorter. Genomic DNA from single cell clones was extracted using the Qiagen DNeasy Blood and Tissue kit and the *BARD1* DNA was PCR amplified and Sanger sequenced to screen for the desired *BARD1* mutation. Heterozygous *BARD1* variants were confirmed using the PolyPeakParser program.<sup>3</sup> Clones that did not integrate a *BARD1* variant at either allele were also propagated for use as non-targeted control clones.

### Quantitative RT-PCR

Total RNA was isolated from exponentially growing neuroblastoma cells utilizing RNeasy mini kits (Qiagen) and mRNAs were converted to cDNA using the SuperScript III system (ThermoFisher Scientific). Taqman® gene expression assays (Thermo Fischer Scientific) were used to quantitate *BARD1* (Hs00184427\_m1 [*BARD1* exon 1-2 boundary] and Hs00957655\_m1 [*BARD1* exon 9-10 boundary]), *BRCA1* (Hs00183233\_m1),

and *HPRT1* (Hs99999909\_m1) on an Applied Biosystems 7900HT Sequence Detection System using standard cycling conditions. Relative transcript abundance was determined by the  $2^{-\Delta\Delta C_t}$  method using *HPRT1* as an internal control.

### **Immunofluorescence**

RPE1 *BARD1*<sup>+/mut</sup> and wild-type cells were seeded on poly-L-lysine coated coverslips (Electron Microscopy Sciences) and treated with 4  $\mu$ M cisplatin or vehicle. Twenty-four hours after treatment, cells were fixed with 4% paraformaldehyde, stained with primary antibody (RAD51, Abcam ab88572, 1:100 or Phospho-Histone H2A.X (Ser139) (20E3), Cell Signaling Technology #9718, 1:800) followed by a secondary Alexa 488 or Alexa 555 antibody. Cells were mounted with ProLong gold with DAPI (Thermo Fisher Scientific, #P36931) and visualized with a Leica DM5000B microscope and photographed with a Leica DFC365 FX camera. RAD51 and  $\gamma$ -H2AX foci were quantified using Focinator v2.0 software and ImageJ.<sup>4</sup>

### **mClover-LMNA assay**

IMR-5 *BARD1*<sup>+/mut</sup> and wild-type cells were co-transfected with 1.6  $\mu$ g pX330-LMNA-gRNA1 and 0.4  $\mu$ g pCR2.1 Clover-LMNA using the Lonza 4D-Nucleofector X-unit<sup>TM</sup> system. The mClover-LMNA reagents were a kind gift from the laboratory of Graham Dellaire. After 3 days, cells were fixed in 2% paraformaldehyde and analyzed on a CytoFLEX-LX flow cytometer to quantitate clover-positive cells.

### **Cytotoxicity studies**

IMR-5 and RPE1 *BARD1*<sup>+/mut</sup> cells and paired wild-type cells were plated on Day 1 in a 96-well plate. On Day 2, serial dilutions of olaparib (Selleck Chemicals, DMSO) or cisplatin (Selleck Chemicals, H<sub>2</sub>O) were added. After 4 days, cell viability was determined using a CellTiter-Glo<sup>®</sup> Assay (Promega) in a GloMax (Promega) plate reader according to the manufacturer's instructions. Luminescence values were normalized to vehicle treated wells and data were analyzed and graphed in GraphPad Prism software and a log (inhibitor) vs. response nonlinear regression model was used to calculate IC<sub>50</sub>s.

## ***In vivo* IMR5 *BARD1*<sup>+/*mut*</sup> xenograft efficacy studies**

*In vivo* murine xenograft efficacy studies were designed to assess the efficacy of olaparib in IMR5 *BARD1*<sup>+/*mut*</sup> isogenic cell line derived xenograft models. IMR5 *BARD1*<sup>+/*mut*</sup> isogenic cell lines were expanded *in vitro* and 5 x 10<sup>6</sup> cells were mixed with Matrigel (Corning, cat# 354234) and injected into the flanks of CB17-SCID mice (Taconic Farms, Germantown NY). When the tumors reached a size of 1-1.5 cm<sup>3</sup>, they were serially passaged into study CB17-SCID mice. When tumors reached enrollment size (0.15 cm<sup>3</sup>-0.3 cm<sup>3</sup>), mice were then randomly enrolled into 2 treatment cohorts (Olaparib or vehicle; n=10 per cohort), using a rolling enrollment to ensure almost identical tumor sizes across treatment cohorts. Olaparib was dosed intraperitoneally at 20mg/kg once daily for 28 days. Tumor sizes were measured at least twice weekly using calipers and tumor volumes were calculated as: volume = ((diameter1/2 + diameter2/2)<sup>3</sup>\*0.5236)/1000. Mice weights were also measured at least twice weekly, and mice were monitored daily for signs of any clinical toxicity. Mice were sacrificed when tumor burden reached 2 cm<sup>3</sup> or they showed any signs of distress including excessive weight loss. All *in vivo* animal studies were performed according to Children's Hospital of Philadelphia (CHOP) policies in the Department of Veterinary Research (DVR) and were conducted according to an approved IACUC Protocol (#0006430). Up to 5 mice were maintained in cages under barrier conditions in a pathogen-free facility fully accredited by the Association for Assessment and Accreditation of Laboratory Animal Care (AAALAC).

## **Quantification and statistical analysis**

Differences between groups were presented as the mean ± SEM as noted in the figure legends. Experimental sample numbers (n) are indicated in the figures, figure legends and results section. All statistical analysis was done with GraphPad Prism and p-values < 0.05 were considered statistically significant. RAD51 and γ-H2AX foci were quantified using Focinator v2.0 software and ImageJ.<sup>4</sup>

## **Whole-genome sequencing of IMR-5 cells**

All code is available on GitHub (<https://github.com/diskin-lab-chop/nbl-bard1>), except when a public pipeline is referenced. After 20 passages, genomic DNA was extracted from three IMR-5 *BARD1*<sup>+/*mut*</sup> clonal cell lines and one non-targeted control clone using the Qiagen Blood and Tissue kit and then treated with RNase to digest RNA. DNA integrity was assessed by pulse-field gel electrophoresis. Libraries were prepared with a 1%

PhiX spike-in, fragmented, and sequenced on an Illumina HiSeq 10X using S2 chemistry with 150 bp paired-end reads to at least 30X mean coverage. Separately, DNA from WT parental IMR-5 cells (prior to 20 passages) was isolated and sequenced with similar methods, and this parental sample served as the “normal” control for filtering variant calls from the *BARD1*<sup>+/*mut*</sup> and non-targeted control clones. FASTQ files were aligned against hg19 (b37 reference from the Broad Institute) with BWA-MEM 0.7.17<sup>5</sup> using the public Seven Bridges Genomics workflow “Whole Genome Sequencing - BWA + GATK 4.0 (with Metrics)” on CAVATICA (<https://www.cavatica.org/>, app ID: admin/sbg-public-data/whole-genome-sequencing-bwa-gatk-4-0, revision 41). After alignment, BAM files were randomly downsampled with Picard DownsampleSam to achieve 50x mean coverage, or 1.1 billion aligned reads, for each of the three *BARD1*<sup>+/*mut*</sup> clones and the non-targeted control clone. Only chromosomes 1-22, X, and Y were considered for subsequent analyses.

### **Copy number analysis**

Copy number segmentation profiles were generated with Control-FREEC v11.5<sup>6</sup> using a public Seven Bridges workflow on CAVATICA (app ID: admin/sbg-public-data/control-freec-11-5, revision 4) with default settings. The parental IMR-5 cell line (described above) was used as the normal control for paired analysis. Segments containing less than 5 genomic bins (approximately 5.6 kb) were removed. Segments overlapping 50% or more with the ENCODE hg19 blacklist<sup>7</sup> or segmental duplications (as defined by the UCSC Genome Browser<sup>8</sup>, considering only those with >95% identity) were removed. Copy number ratio thresholds for gain and loss were set at 1.2 and 0.8, respectively. Breakpoint analysis was performed with the *svpluscnv* R package (<https://github.com/ccbiolab/svpluscnv>)<sup>9</sup>, based on methods developed by Lopez *et al.*<sup>10</sup> Double-strand breaks were quantified by counting regions where the fold change between any two adjacent segments was greater than 1.2 or less than 0.8 (*fc.pct*=0.2).

### **Structural variant (SV) analysis**

SVs were called with Delly v0.7.9<sup>11</sup> in paired mode, using the parental IMR-5 cell line as the normal control. SVs were filtered for the default PASS criteria at the dataset and individual levels and required to have at least 5 reads supporting the alternate allele (considering both split-read and paired-read support). SVs with one or more breakpoints falling within the ENCODE blacklist or segmental duplications (described above) were

removed. Stringent filtering (shown in **Figure 3B-D, Supplemental Figure 2B-C**) considered only precise SVs supported by split reads, whereas relaxed filtering (shown in **Supplemental Figure 3A-E**) included both precise and imprecise SVs.

### **Single-nucleotide variant (SNV) and indel analysis**

SNVs and indels were called with MuTect2<sup>12</sup> from GATK v4.1.3.0, again using parental IMR-5 as the normal control. The read orientation bias filter was applied. Variants flagged by FilterMutectCalls for any reason except “clustered\_events” were removed. Di- and tri-nucleotide polymorphism calls were removed. For all figures except the mutational signature analysis, variants were required to have at least 5 reads supporting the alternate allele.

### **Mutational signature analysis**

The above filtered variant calls were used as input to the deconstructSigs v. 1.9.0 R package to perform mutational signature analysis using the following signature sets: COSMIC v2 SBS and COSMIC v3.2 SBS (<https://cancer.sanger.ac.uk/signatures/>). The v3.2 COSMIC mutational signatures were down-sampled to remove signatures driven by therapy, environmental exposures, and/or sequencing artifacts, along with SBS39 due to the high similarity to SBS3, while maintaining other neuroblastoma-specific<sup>13</sup> and biologically relevant signatures. Our analysis code can be found on GitHub (<https://github.com/diskin-lab-chop/nbl-bard1>).

## Supplemental Data

**Supplemental Table 1.** Characteristics of neuroblastoma-associated germline *BARD1* variants.

| USI    | Age at diagnosis (Days) | Sex    | <i>MYCN</i> | Risk group   | Variant                    | Exon | Cell line models | Other cancers associated with germline <i>BARD1</i> variant                                                                       |
|--------|-------------------------|--------|-------------|--------------|----------------------------|------|------------------|-----------------------------------------------------------------------------------------------------------------------------------|
| PATZRU | 833                     | Male   | NA          | High         | c.159-1G>T (splice site)   | 2    |                  | Breast <sup>14</sup>                                                                                                              |
| PAHYWC | 704                     | Male   | Amp         | High         | c.C334T; p.R112*           | 3    | IMR-5 x 2        | Breast <sup>14, 15</sup>                                                                                                          |
| PARSEA | 1779                    | Male   | NA          | High         | c.448C>T; p.R150*          | 4    | IMR-5            | Breast <sup>14, 16</sup><br>Ovarian <sup>17</sup>                                                                                 |
| PATHJZ | 340                     | Female | NA          | Intermediate | c.860_861del; p.E287fs     | 4    | IMR-5 x 3        | -                                                                                                                                 |
| PASGEE | 1825                    | Male   | NA          | High         | c.1677+1G>T (splice donor) | 7    |                  | -                                                                                                                                 |
| PASFDU | 758                     | Female | NA          | High         | c.C1690T; p.Q564*          | 8    | RPE1             | Breast <sup>14, 16, 18-22</sup><br>Ovarian <sup>16, 19, 23, 24</sup><br>Endometrial <sup>25</sup><br>Colorectal <sup>22, 26</sup> |
| PATGWT | 591                     | Male   | Amp         | High         | c.1921C>T; p.R641*         | 10   |                  | Breast <sup>21, 27, 28</sup><br>Pancreatic <sup>29</sup>                                                                          |
| PASCIX | 1660                    | Male   | NA          | High         | c.1935_1954dup; p.Glu652fs | 10   |                  | Breast <sup>16, 30, 31</sup>                                                                                                      |

Amp., *MYCN* amplified tumor; NA, *MYCN* non-amplified tumor.

**Supplemental Table 2.** Guide RNAs and repair template oligonucleotides used to generate *BARD1* isogenic cell lines.

| Variant                | Guide RNA                                     | Single-stranded repair oligonucleotide                                                                                                                                       | Notes                  |
|------------------------|-----------------------------------------------|------------------------------------------------------------------------------------------------------------------------------------------------------------------------------|------------------------|
| c.C334T; p.R112*       | CTTGAAGATAAATAGACAAC<br>GTTGTCTATTTATCTTCAAG  | ACTGATGAATTTAACTAAGAGAGATAGGGATAGTT<br>CTTACCTGACAGCTCATTG<br>TCATGTAGCAAATTTCAAGCTTACTACAAAGTTGA<br>ATCATGCTGTCGAGTTGTC<br>TATTTATCTTCAAGTCTTGTATCCAGGCCGGG                 |                        |
| c.C448T; p.R150*       | ATCTGACTTTCTTACTTCGA<br>TCGAAGTAAGAAAGTCAGAT  | GCATCTTTTTTATTGCAGGCTGGGTTTGCCTGA<br>AGCTTTACTCACAAACATAT<br>CTGACTTTCTTACTTCAAGGAGAAAACCATTTTTA<br>ATTGAATCTTCTTGTTC<br>CTGCATCATTAACAAACTTTTCTAGGTTTA                      |                        |
| c.860_861del; p.E287fs | AGTCTCCAGACACTAAGAGC<br>GCTCTTAGTGTCTGGAGACT  | GGCTCCTTGACAGAATCTGAATGTTTTGGAAGTTT<br>AACTGAAGTCTTTACCA<br>TTGGCTGAGCAAATAG__TCTCCAGACACTAAGAG<br>CAGAAATGAAGTAGTGACT<br>CCTGAGAAGGTCTGCAAAAATTATCTTACATC                   | Utilized for E287 #1   |
|                        |                                               | TAGATGTAAGATAATTTTTGCAGACCTTCTCAGGA<br>GTCACTACTTCATTCT <sup>a</sup> TGC<br>TCTTAGTGTCTGGAGA__CTATTTGCTCAGCCAAT<br>GGTAAAGAGACTTCAGTT<br>AAACTTCCAAAACATTCAGATTCTGTCAAGGAGCC | Utilized for E287 #2,3 |
| c.C1960T; p.Q564*      | TATATTAACAGATGAACACT<br>AGTGTTTCATCTGTTAATATA | TCACTGAGCATTTTTCTGTTGTTCTGAAGACAGCCC<br>ACTGCCTATAAGTACAAGA<br>GGTCCATCCCTACGCTATCCAGTGTTTCATCTGTTA<br>ATATAAAAGGAGATACCAGTGTTAAAAACATTAGA<br>CGACTAGACAAAGACAT              |                        |

<sup>a</sup>This PAM variant is non-synonymous, but occurs after the frameshift at codon 287 and subsequent truncating variant at codon 291 Double underline, Pathogenic variant; *italic*: Protospacer adjacent motif (PAM) variant.

**Supplemental Table 3.** Possible CRISPR off-target sites evaluated via Sanger sequencing.

| <b>Guide RNA</b> | <b>Type</b>     | <b>Forward Primer</b>    | <b>Reverse Primer</b>     | <b>CFD Score</b> |
|------------------|-----------------|--------------------------|---------------------------|------------------|
| R112*            | Intergenic      | ACCTCACATGTGCTAAGGATGT   | GTGATTTTCCTTACGAAGTGCTGA  | 0.90             |
|                  | Exon (RP6)      | AGGTCTTACTCCCAAACATGTCA  | ACATGCAAAGTAAACACTTGCA    | 0.13             |
|                  | Exon (RP11)     | AGCTTTTACACATGCTGAGACT   | CACACACACAAACACCACACA     | 0.07             |
| R150*            | Intergenic      | AGGGCAAGACAAGACTGCAA     | CTTGGCTGGAAGGAGCATGA      | 0.41             |
|                  | Exon (EPAS1)    | TGGTTCTCTGGCCATTCCC      | CAAATGTGAGGTGCTGCCAC      | 0.14             |
| E287fs           | Intergenic      | GCATTTTAGCATGGTGTCTATGGT | ACGTATCAACAAATAGCATTCACT  | 0.67             |
|                  | Exon (CCR9)     | TGTTATCGGGTAGCTGCCTG     | GATGCAACTCTCCCTGGGAC      | 0.41             |
|                  | Exon (LL22NC03) | TCCTGTCTGTCTGTTTCGG      | GAGCCACAGGTGAGAGTGAC      | 0.05             |
| Q564*            | Intergenic      | TCATTGAACTGCATACAAGTGCT  | ATTGAAAAGTGGATATTCTCTGCTT | 0.36             |
|                  | Exon (RP11)     | CCTGGGACTCGAACCGTATG     | GTACAACCTGGTGTGGAGGG      | 0.33             |
|                  | Exon (UBE2G1)   | AAAGCCACCTCGTTCAGTGT     | ACTTCCCTTCCTCTGTGCGGA     | 0.04             |



## Supplemental Figures and Figure Legends

Supplemental Figure 1

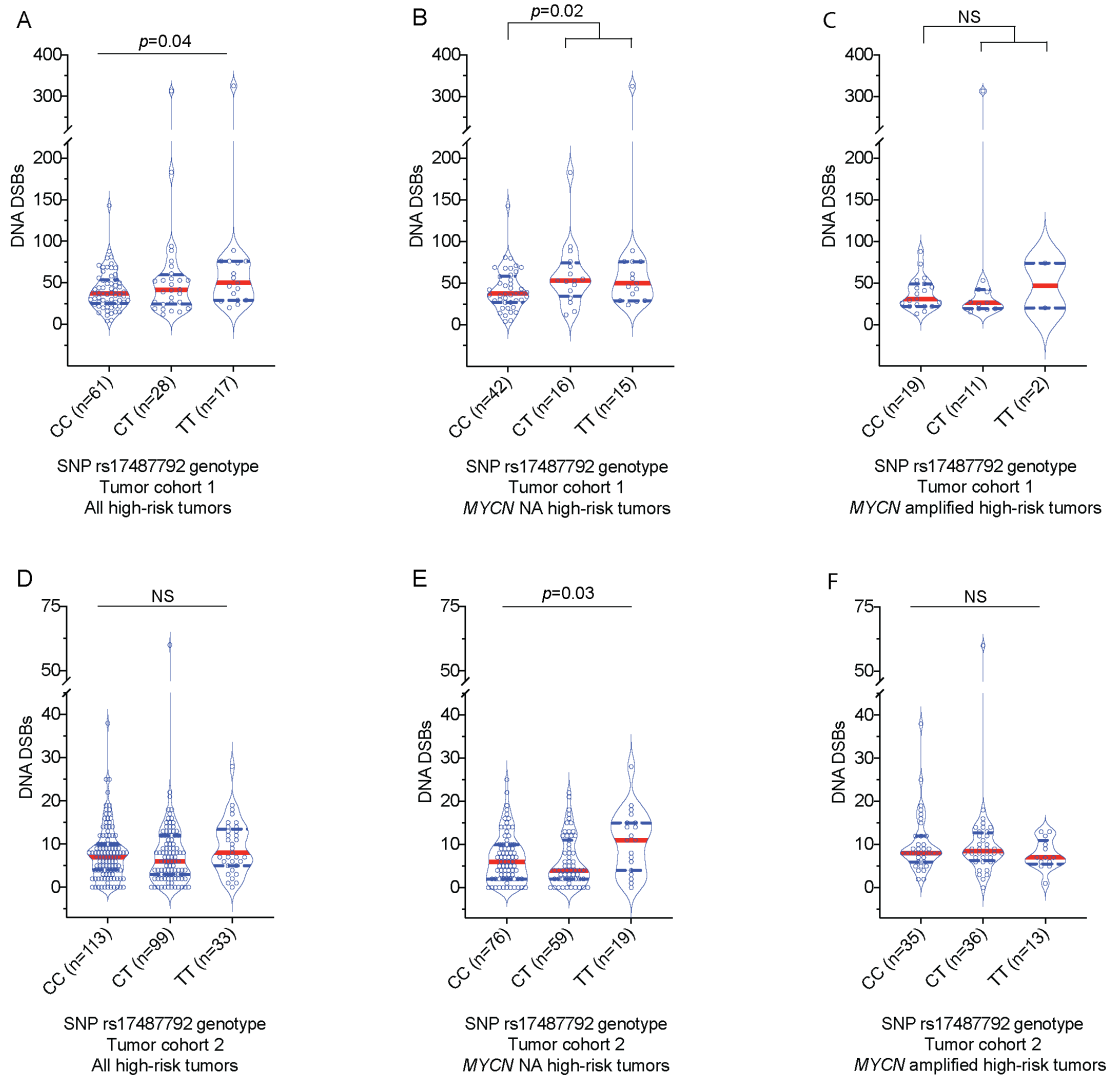

### Supplemental Figure 1. Common *BARD1* germline risk variants correlate with genome-wide deficiencies in DNA repair in high-risk *MYCN* non-amplified primary neuroblastomas.

(A-F) Violin plots depicting the number of DNA DSBs in neuroblastoma tumors from only high-risk patients with different germline SNP rs17487792 genotypes. Panels A, B and C depict DNA DSBs in all high-risk tumors, high-risk tumors without *MYCN* amplification and high-risk tumors with *MYCN* amplification in tumor cohort 1, respectively. Panels D, E and F depict DNA DSBs in all high-risk tumors, high-risk tumors without *MYCN* amplification and high-risk tumors with *MYCN* amplification in tumor cohort 2, respectively. Red dotted line denotes median and blue dotted lines denotes quartiles.

*MYCN* NA, *MYCN* non-amplified.

Associated with **Figure 1**.

# Supplemental Figure 2

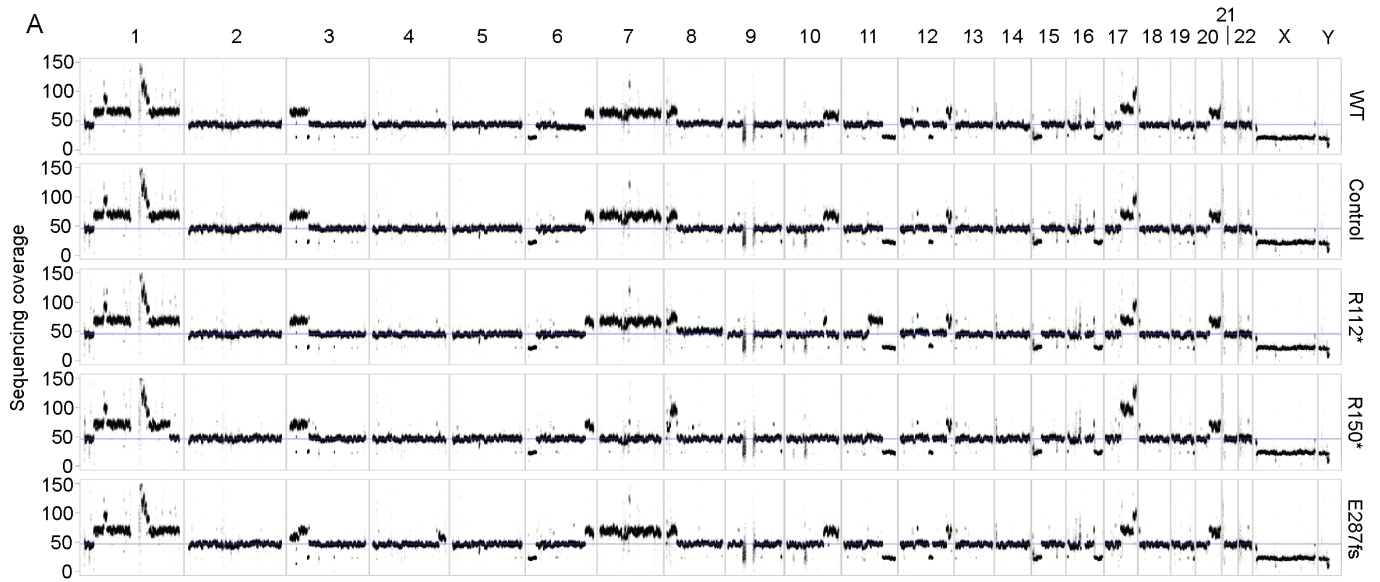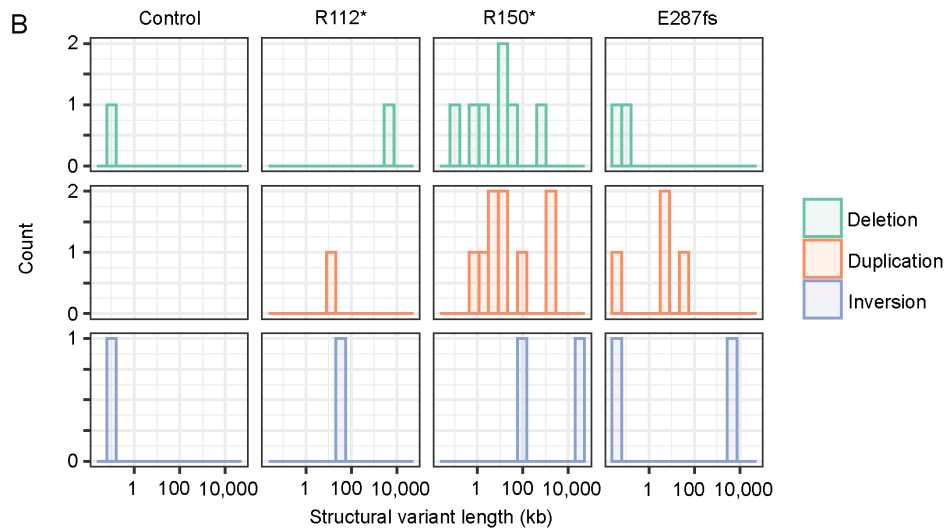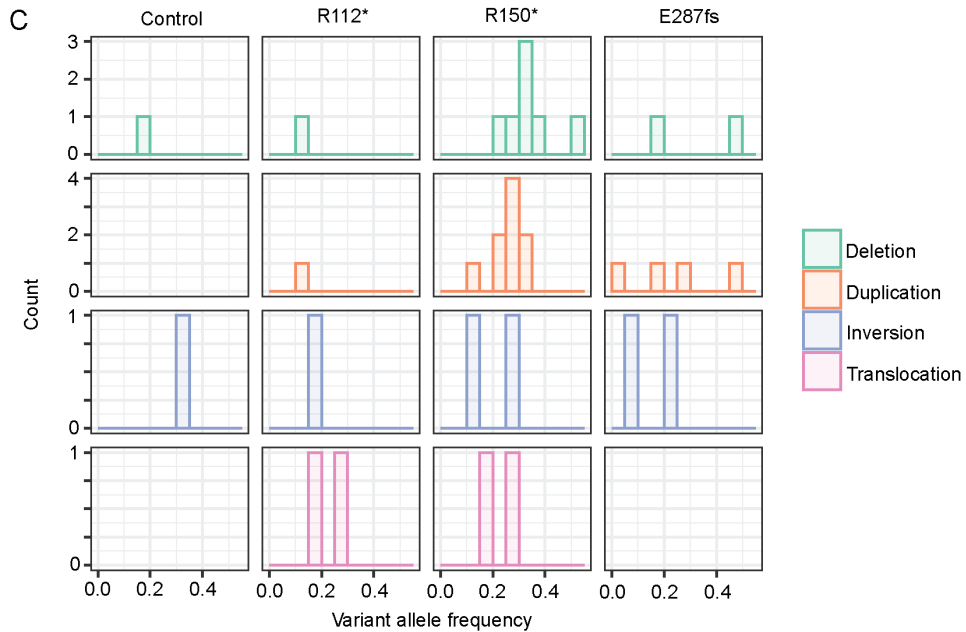

**Supplemental Figure 2. *BARD1*<sup>+/-mut</sup> neuroblastoma IMR-5 clonal cell lines exhibit genome-wide genomic instability.**

**(A)** Whole-genome sequencing coverage for WT parental cells, a non-targeted control clone and *BARD1*<sup>+/-mut</sup> isogenic IMR-5 cells.

**(B)** Histograms showing length of structural variants in control and *BARD1*<sup>+/-mut</sup> isogenic IMR-5 cells.

**(C)** Histograms showing allele frequency of structural variants in control and *BARD1*<sup>+/-mut</sup> isogenic IMR-5 cells.

Associated with **Figure 3**.

### Supplemental Figure 3

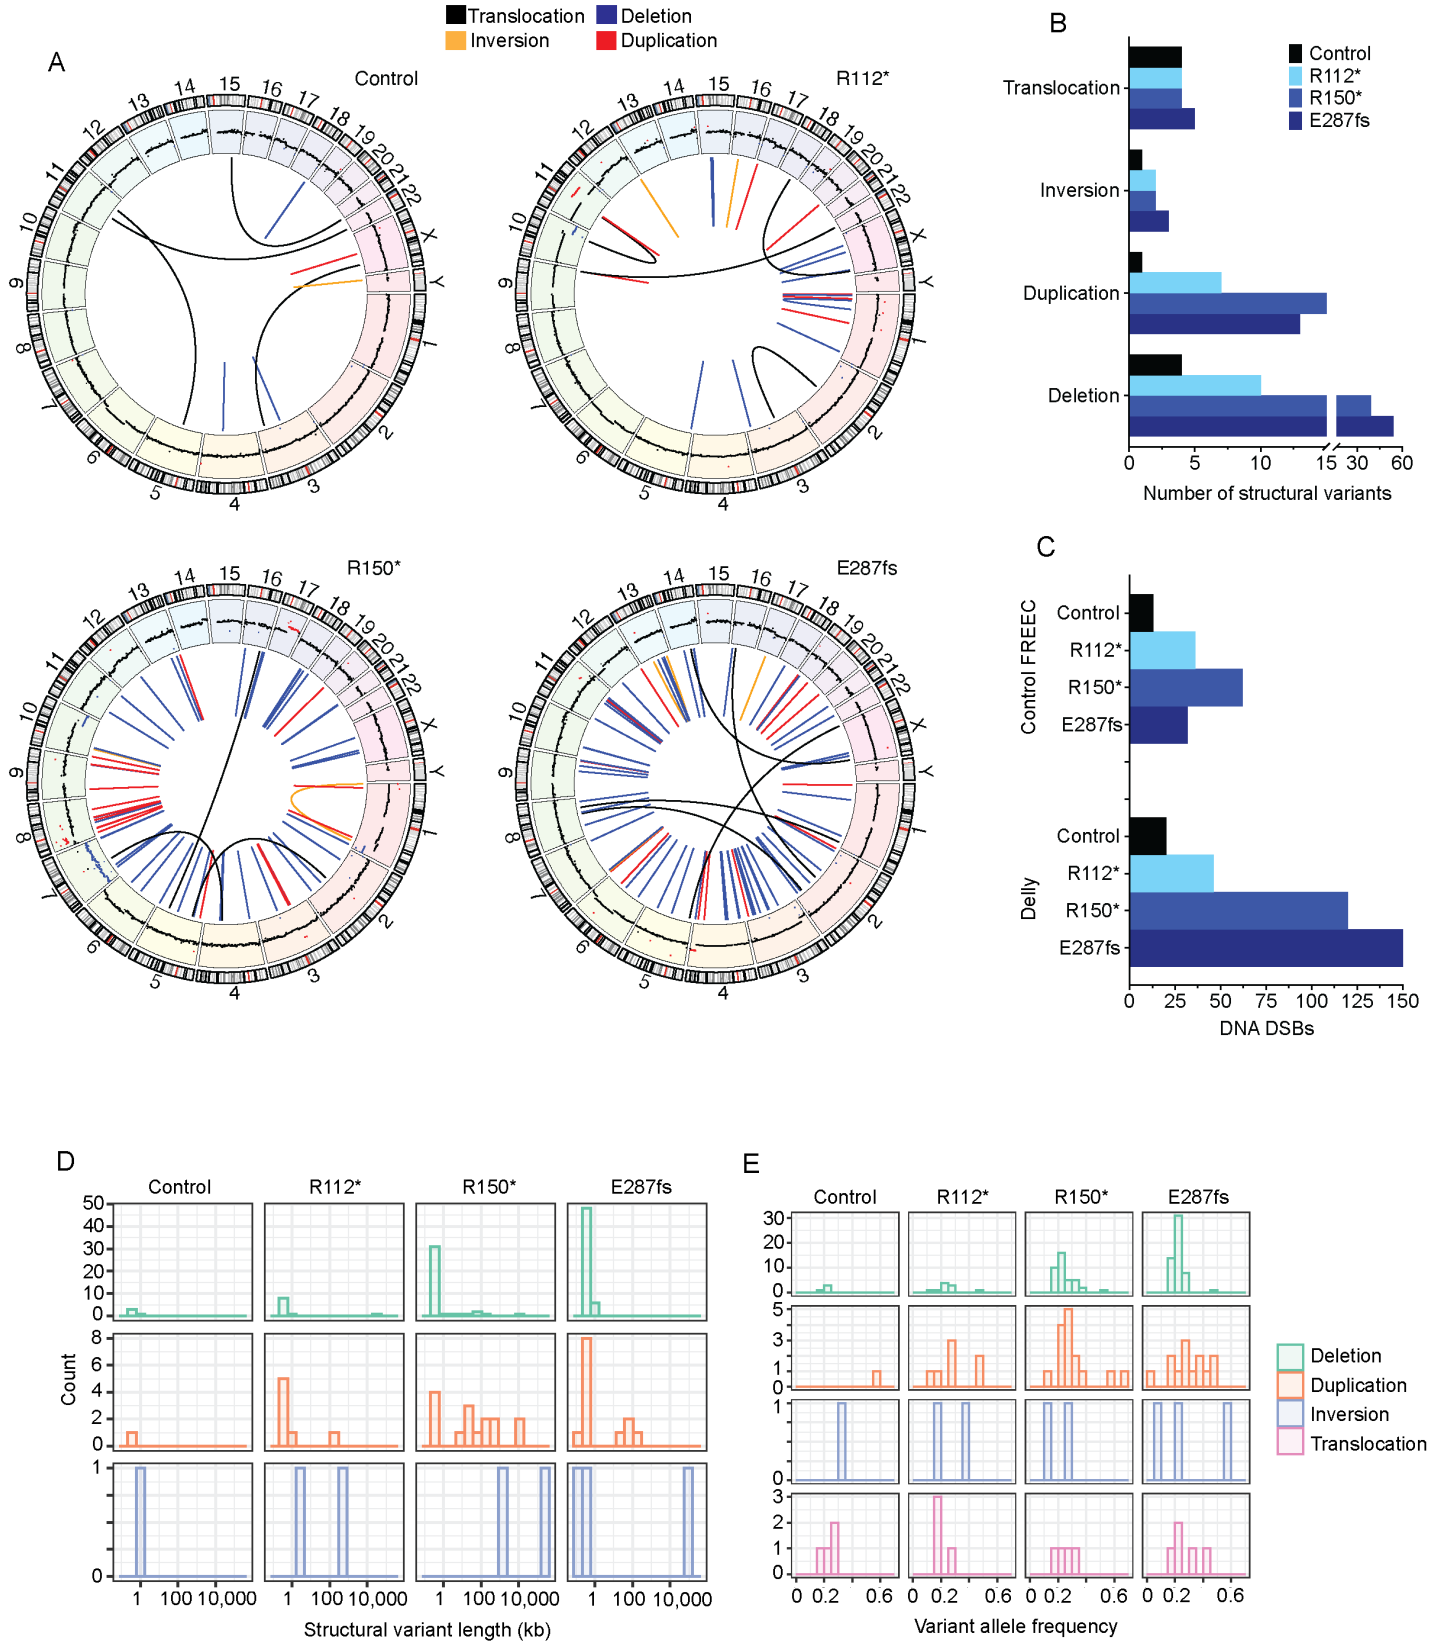

**Supplemental Figure 3. Structural variant analysis with relaxed filtering confirms increased genome instability in *BARD1*<sup>+/-mut</sup> neuroblastoma IMR-5 clonal cell lines.**

**(A)** Circos plots depicting identified structural variants in control and *BARD1*<sup>+/-mut</sup> isogenic IMR-5 models using less stringent filtering parameters.

**(B)** Counts of structural variants in control and *BARD1*<sup>+/-mut</sup> isogenic IMR-5 cells using less stringent filtering parameters.

**(C)** Counts of DNA DSBs in control and *BARD1*<sup>+/-mut</sup> IMR-5 cells, quantified from the Control-FREEC copy number (**top**) and the Delly structural variant data (**bottom**) using less stringent filtering parameters.

**(D)** Histograms showing length of structural variants in control and *BARD1*<sup>+/-mut</sup> isogenic IMR-5 cells using less stringent filtering parameters.

**(E)** Histograms showing allele frequency of structural variants in control and *BARD1*<sup>+/-mut</sup> IMR-5 isogenic cells using less stringent filtering parameters.

Associated with **Figure 3**.

# Supplemental Figure 4

■ SNV  
■ Small Deletion  
■ Small Insertion

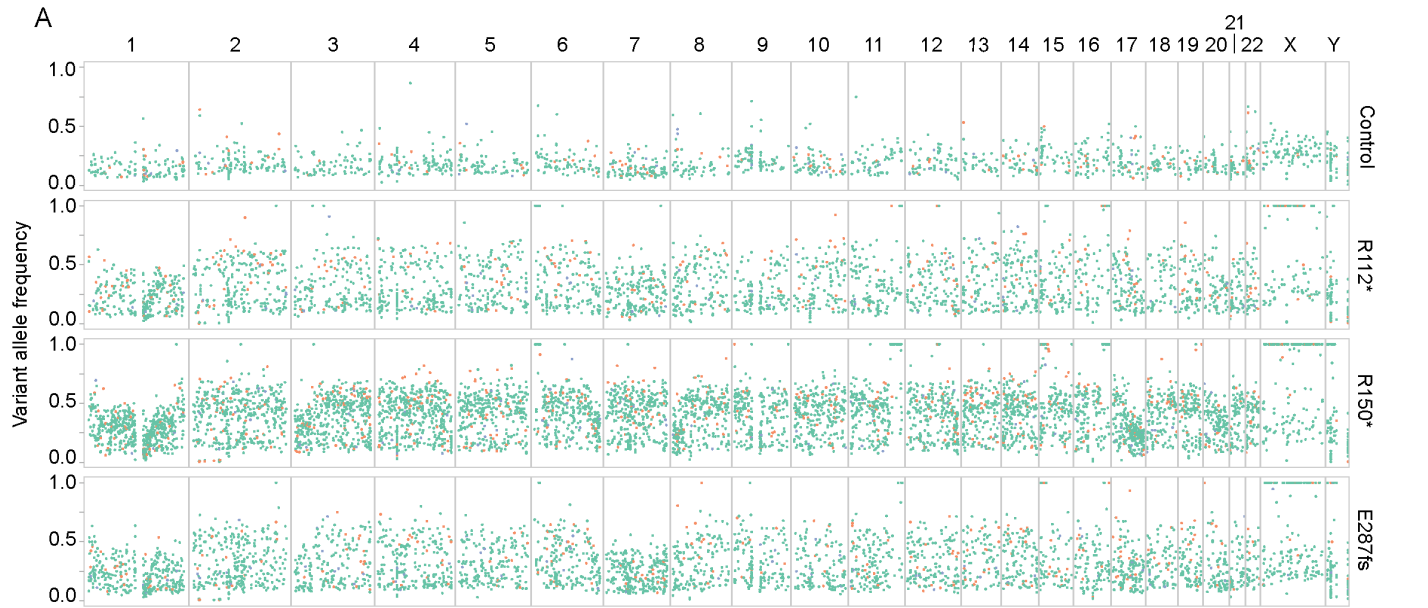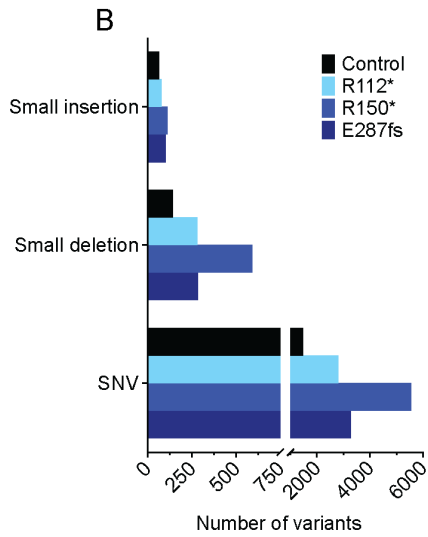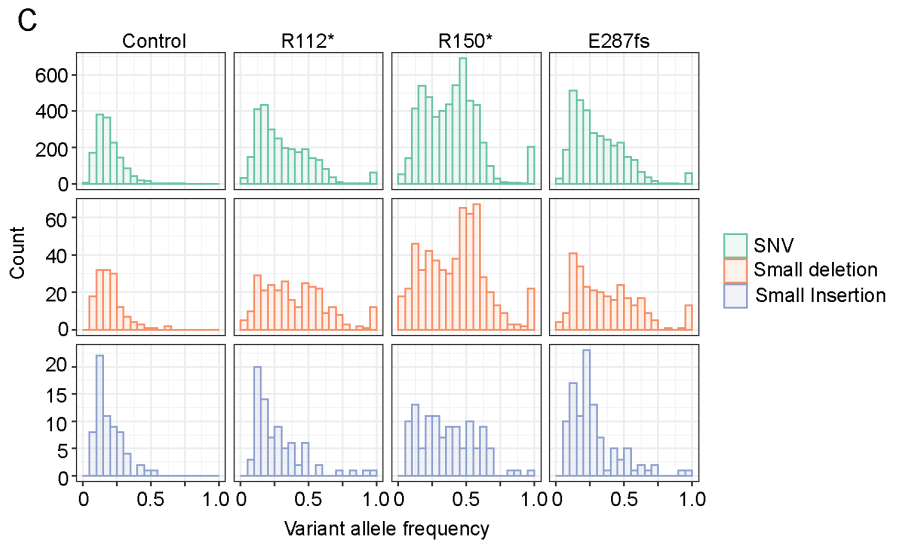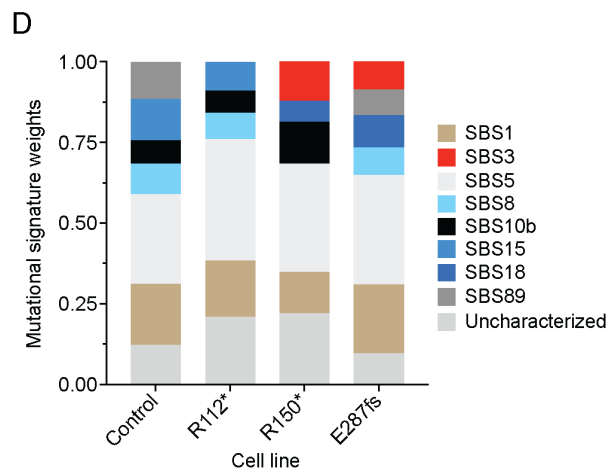

**Supplemental Figure 4. IMR-5 *BARD1*<sup>+/*mut*</sup> isogenic cells acquired more SNVs and indels than the non-targeted control clone.**

(A) Variant allele frequency distribution across the genome for SNVs and indels acquired in control clone and *BARD1*<sup>+/*mut*</sup> isogenic IMR-5 cells relative to WT parental IMR-5 cells.

(B) Count of SNVs and indels identified in control and *BARD1*<sup>+/*mut*</sup> isogenic IMR-5 cells.

(C) Histograms showing allele frequency of SNVs and indels identified in control and *BARD1*<sup>+/*mut*</sup> isogenic IMR-5 models.

(D) Plot of mutational signature weights in non-targeted control and *BARD1*<sup>+/*mut*</sup> IMR-5 cells using COSMIC mutational signatures (v3.2).

Associated with **Figure 3**.

## Supplemental Figure 5

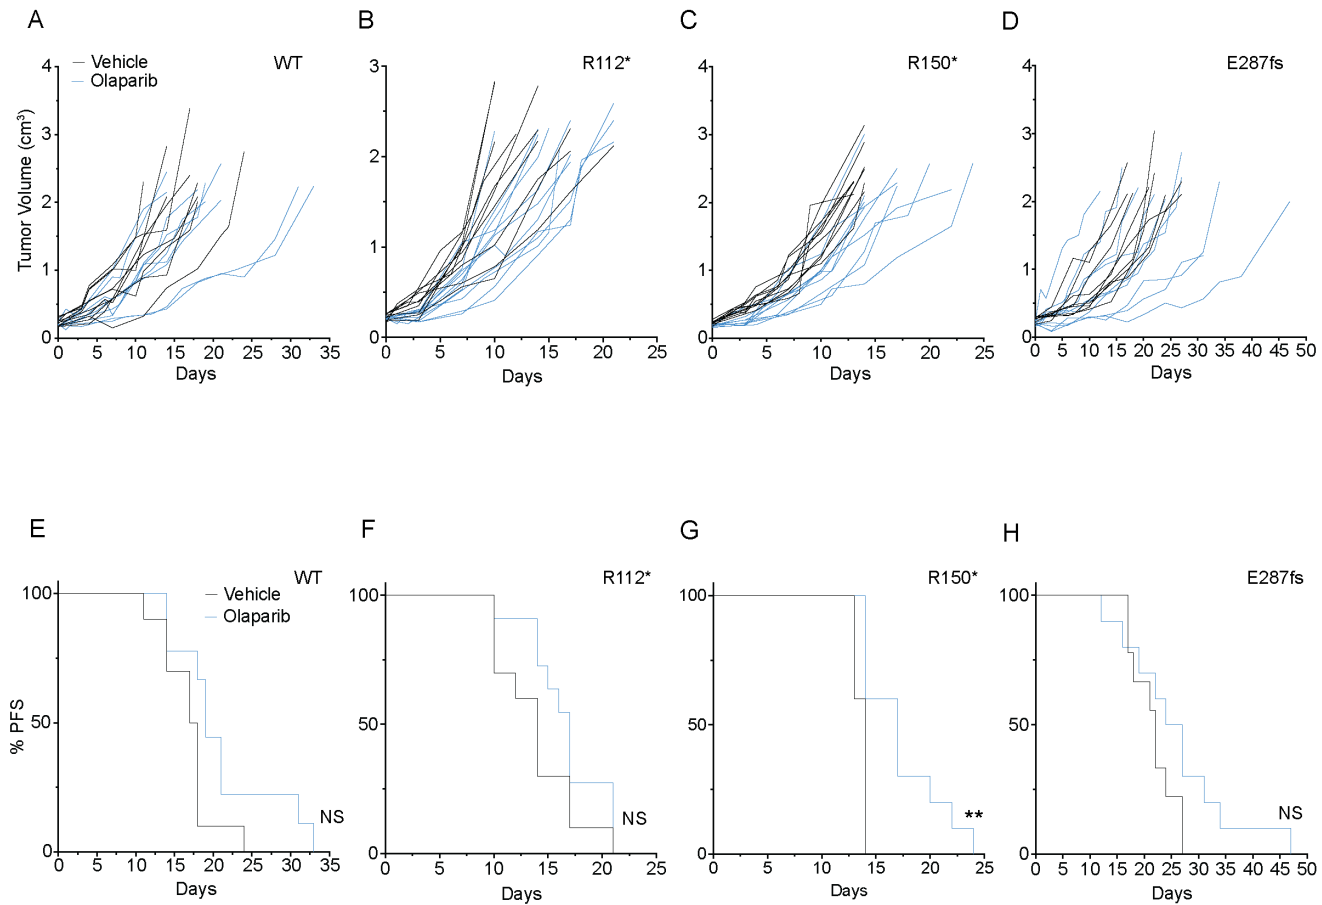

### Supplemental Figure 5. IMR-5 and RPE1 $BARD1^{+/mut}$ models show increased sensitivity to olaparib and cisplatin.

(A-D) Individual tumor growth curves of WT and  $BARD1^{+/mut}$  IMR-5 xenografts treated with daily olaparib or vehicle [WT IMR-5 (A),  $BARD1^{+/R112^*}$  (B),  $BARD1^{+/R150^*}$  (C),  $BARD1^{+/E287fs}$  (D)].

(E-H) Progression-free survival of mice with WT and  $BARD1^{+/mut}$  IMR-5 xenografts treated with daily olaparib or vehicle [WT IMR-5 (E),  $BARD1^{+/R112^*}$  (F),  $BARD1^{+/R150^*}$  (G),  $BARD1^{+/E287fs}$  (H)].

\*\* $P < 0.01$ ; NS, not significant.

Associated with **Figure 4**.



## Supplemental References

1. Chu VT, Weber T, Wefers B, et al. Increasing the efficiency of homology-directed repair for CRISPR-Cas9-induced precise gene editing in mammalian cells. *Nat Biotechnol.* May 2015;33(5):543-8.  
doi:10.1038/nbt.3198
2. Yu C, Liu Y, Ma T, et al. Small molecules enhance CRISPR genome editing in pluripotent stem cells. *Cell Stem Cell.* Feb 5 2015;16(2):142-7. doi:10.1016/j.stem.2015.01.003
3. Hill JT, Demarest BL, Bisgrove BW, Su YC, Smith M, Yost HJ. Poly peak parser: Method and software for identification of unknown indels using sanger sequencing of polymerase chain reaction products. *Dev Dyn.* Dec 2014;243(12):1632-6. doi:10.1002/dvdy.24183
4. Oeck S, Malewicz NM, Hurst S, Al-Refae K, Krysztofiak A, Jendrossek V. The Focinator v2-0 - Graphical Interface, Four Channels, Colocalization Analysis and Cell Phase Identification. *Radiat Res.* Jul 2017;188(1):114-120. doi:10.1667/RR14746.1
5. Li H, Durbin R. Fast and accurate short read alignment with Burrows-Wheeler transform. *Bioinformatics.* Jul 15 2009;25(14):1754-60. doi:10.1093/bioinformatics/btp324
6. Boeva V, Popova T, Bleakley K, et al. Control-FREEC: a tool for assessing copy number and allelic content using next-generation sequencing data. *Bioinformatics.* Feb 1 2012;28(3):423-5.  
doi:10.1093/bioinformatics/btr670
7. Amemiya HM, Kundaje A, Boyle AP. The ENCODE Blacklist: Identification of Problematic Regions of the Genome. *Sci Rep.* Jun 27 2019;9(1):9354. doi:10.1038/s41598-019-45839-z
8. Karolchik D, Hinrichs AS, Furey TS, et al. The UCSC Table Browser data retrieval tool. *Nucleic Acids Res.* Jan 1 2004;32(Database issue):D493-6. doi:10.1093/nar/gkh103
9. Lopez G, Egolf LE, Giorgi FM, Diskin SJ, Margolin AA. svpluscnv: analysis and visualization of complex structural variation data. *Bioinformatics.* Jul 27 2021;37(13):1912-1914. doi:10.1093/bioinformatics/btaa878
10. Lopez G, Conkrite KL, Doepner M, et al. Somatic structural variation targets neurodevelopmental genes and identifies SHANK2 as a tumor suppressor in neuroblastoma. *Genome Res.* Sep 2020;30(9):1228-1242.  
doi:10.1101/gr.252106.119

11. Rausch T, Zichner T, Schlattl A, Stutz AM, Benes V, Korbel JO. DELLY: structural variant discovery by integrated paired-end and split-read analysis. *Bioinformatics*. Sep 15 2012;28(18):i333-i339. doi:10.1093/bioinformatics/bts378
12. Cibulskis K, Lawrence MS, Carter SL, et al. Sensitive detection of somatic point mutations in impure and heterogeneous cancer samples. *Nat Biotechnol*. Mar 2013;31(3):213-9. doi:10.1038/nbt.2514
13. Brady SW, Liu Y, Ma X, et al. Pan-neuroblastoma analysis reveals age- and signature-associated driver alterations. *Nat Commun*. Oct 14 2020;11(1):5183. doi:10.1038/s41467-020-18987-4
14. Weber-Lassalle N, Borde J, Weber-Lassalle K, et al. Germline loss-of-function variants in the BARD1 gene are associated with early-onset familial breast cancer but not ovarian cancer. *Breast Cancer Res*. Apr 29 2019;21(1):55. doi:10.1186/s13058-019-1137-9
15. Gonzalez-Rivera M, Lobo M, Lopez-Tarruella S, et al. Frequency of germline DNA genetic findings in an unselected prospective cohort of triple-negative breast cancer patients participating in a platinum-based neoadjuvant chemotherapy trial. *Breast Cancer Res Treat*. Apr 2016;156(3):507-515. doi:10.1007/s10549-016-3792-1
16. Susswein LR, Marshall ML, Nusbaum R, et al. Pathogenic and likely pathogenic variant prevalence among the first 10,000 patients referred for next-generation cancer panel testing. *Genet Med*. Aug 2016;18(8):823-32. doi:10.1038/gim.2015.166
17. Norquist BM, Harrell MI, Brady MF, et al. Inherited Mutations in Women With Ovarian Carcinoma. *JAMA Oncol*. Apr 2016;2(4):482-90. doi:10.1001/jamaoncol.2015.5495
18. Domagala P, Jakubowska A, Jaworska-Bieniek K, et al. Prevalence of Germline Mutations in Genes Engaged in DNA Damage Repair by Homologous Recombination in Patients with Triple-Negative and Hereditary Non-Triple-Negative Breast Cancers. *PLoS One*. 2015;10(6):e0130393. doi:10.1371/journal.pone.0130393
19. Klonowska K, Ratajska M, Czubak K, et al. Analysis of large mutations in BARD1 in patients with breast and/or ovarian cancer: the Polish population as an example. *Sci Rep*. May 21 2015;5:10424. doi:10.1038/srep10424
20. Ratajska M, Antoszewska E, Piskorz A, et al. Cancer predisposing BARD1 mutations in breast-ovarian cancer families. *Breast Cancer Res Treat*. Jan 2012;131(1):89-97. doi:10.1007/s10549-011-1403-8

21. De Brakeleer S, De Greve J, Desmedt C, et al. Frequent incidence of BARD1-truncating mutations in germline DNA from triple-negative breast cancer patients. *Clin Genet*. Mar 2016;89(3):336-40. doi:10.1111/cge.12620
22. Adamovich AI, Banerjee T, Wingo M, et al. Functional analysis of BARD1 missense variants in homology-directed repair and damage sensitivity. *PLoS Genet*. Mar 2019;15(3):e1008049. doi:10.1371/journal.pgen.1008049
23. Ratajska M, Matusiak M, Kuzniacka A, et al. Cancer predisposing BARD1 mutations affect exon skipping and are associated with overexpression of specific BARD1 isoforms. *Oncol Rep*. Nov 2015;34(5):2609-17. doi:10.3892/or.2015.4235
24. Ramus SJ, Song H, Dicks E, et al. Germline Mutations in the BRIP1, BARD1, PALB2, and NBN Genes in Women With Ovarian Cancer. *J Natl Cancer Inst*. Nov 2015;107(11)doi:10.1093/jnci/djv214
25. Ring KL, Bruegl AS, Allen BA, et al. Germline multi-gene hereditary cancer panel testing in an unselected endometrial cancer cohort. *Mod Pathol*. Nov 2016;29(11):1381-1389. doi:10.1038/modpathol.2016.135
26. Blazer KR, Nehoray B, Solomon I, et al. Next-Generation Testing for Cancer Risk: Perceptions, Experiences, and Needs Among Early Adopters in Community Healthcare Settings. *Genet Test Mol Biomarkers*. Dec 2015;19(12):657-65. doi:10.1089/gtmb.2015.0061
27. Gass J, Tatro M, Blackburn P, Hines S, Atwal PS. BARD1 nonsense variant c.1921C>T in a patient with recurrent breast cancer. *Clin Case Rep*. Feb 2017;5(2):104-107. doi:10.1002/ccr3.793
28. Feliubadalo L, Tonda R, Gausachs M, et al. Benchmarking of Whole Exome Sequencing and Ad Hoc Designed Panels for Genetic Testing of Hereditary Cancer. *Sci Rep*. Jan 4 2017;7:37984. doi:10.1038/srep37984
29. Hu C, Hart SN, Bamlet WR, et al. Prevalence of Pathogenic Mutations in Cancer Predisposition Genes among Pancreatic Cancer Patients. *Cancer Epidemiol Biomarkers Prev*. Jan 2016;25(1):207-11. doi:10.1158/1055-9965.EPI-15-0455
30. Couch FJ, Hart SN, Sharma P, et al. Inherited mutations in 17 breast cancer susceptibility genes among a large triple-negative breast cancer cohort unselected for family history of breast cancer. *J Clin Oncol*. Feb 1 2015;33(4):304-11. doi:10.1200/JCO.2014.57.1414

31. De Brakeleer S, De Greve J, Loris R, et al. Cancer predisposing missense and protein truncating BARD1 mutations in non-BRCA1 or BRCA2 breast cancer families. *Hum Mutat.* Mar 2010;31(3):E1175-85. doi:10.1002/humu.21200
